# Supplementary material for: Facile synthesis of Ag nanowires/mesoporous TiO2core–shell nanocables with improved properties for lithium storage
Source: Royal Society of Chemistry journal article supplement (doi:10.1039/c5nj01489a), 2015-01-01
Supplement: c5nj01489a1.pdf [file c5nj01489a1.pdf]

## Facile synthesis of Ag nanowires/mesoporous TiO<sub>2</sub> core-shell nanocables with improved properties for lithium storage

GenLong Qu,<sup>a</sup> Hongbo Geng,<sup>a</sup> Jun Guo,<sup>b</sup> Junwei Zheng,<sup>c</sup> Hongwei Gu<sup>\*a</sup>

<sup>a</sup>Key Laboratory of Organic Synthesis of Jiangsu Province, College of Chemistry, Chemical Engineering and Materials Science & Collaborative Innovation Center of Suzhou Nano Science and Technology, Soochow University, Suzhou, 215123, China. E-mail: hongwei@suda.edu.cn

<sup>b</sup>Analysis and Testing Center, Soochow University,

<sup>c</sup>College of Physics, Optoelectronics and Energy, Soochow University, Suzhou, 215006, China

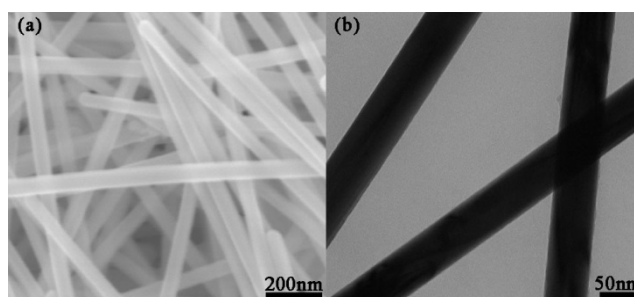

Figure S1. (a) SEM and (b) TEM images of Ag Nanowires.

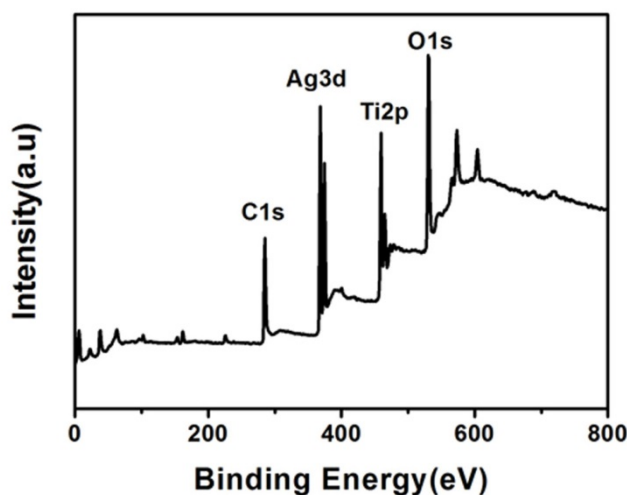

Figure S2. The survey spectrum of AgNW@mTiO<sub>2</sub> nanocables.

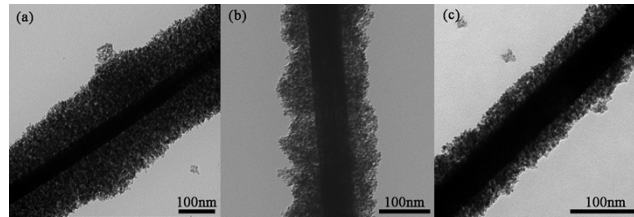

Figure S3. The TEM images of Ag/TiO<sub>2</sub>-0.1 (a), Ag/TiO<sub>2</sub> (b) and Ag/TiO<sub>2</sub>-0.4 (c) nanocable.

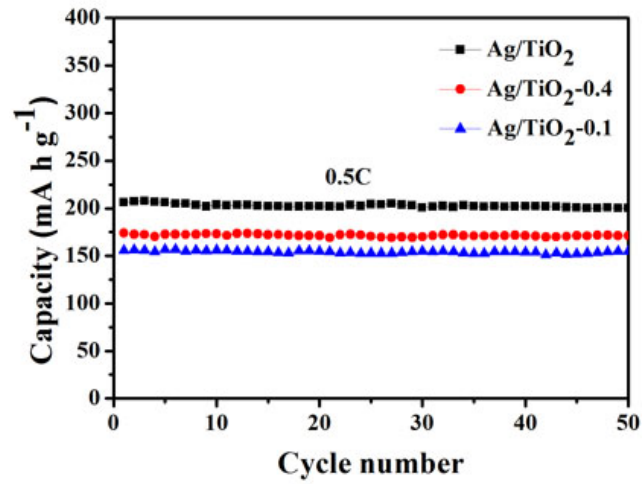

Figure S4. Cycling performance of Ag/TiO<sub>2</sub>, Ag/TiO<sub>2</sub>-0.4 and Ag/TiO<sub>2</sub>-0.1 at a current of 0.5 C.

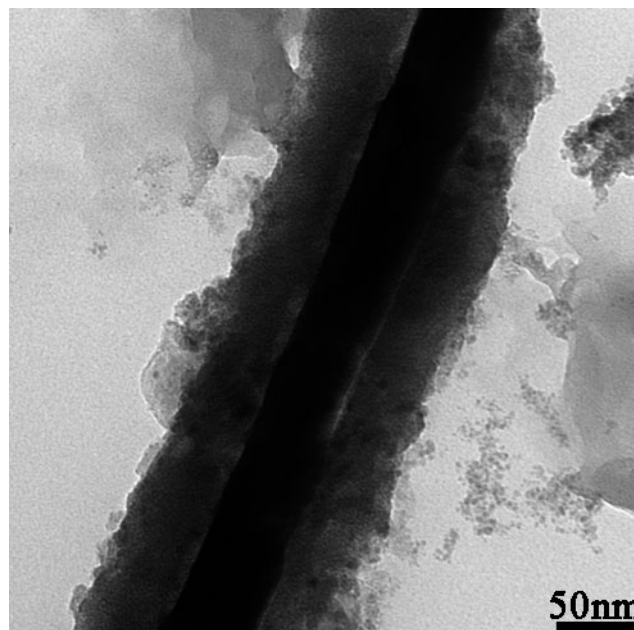

Figure S5. The TEM images of Ag/TiO<sub>2</sub> core-shell nanocables after 50 cycles at a rate of 1 C.

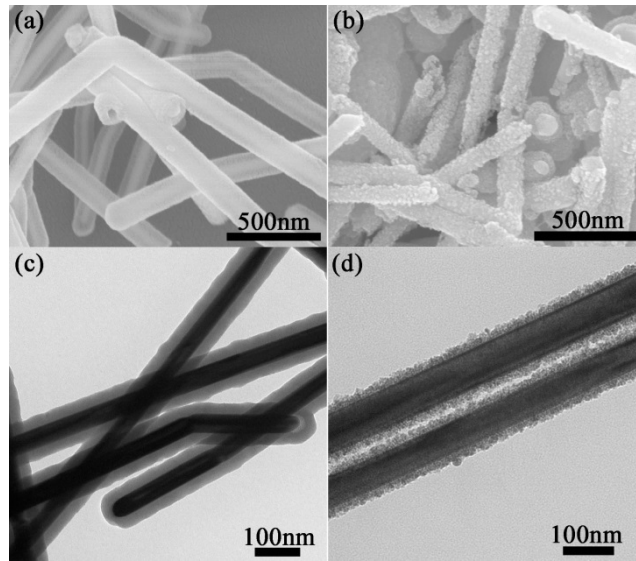

Figure S6. (a) SEM and (c) TEM images of AgNW@SiO<sub>2</sub> nanocables; (b) SEM and (d) TEM images of the AgNW@SnO<sub>2</sub> nanocables.
